# Supplementary material for: Recurrent Salmonella typhi Infection and Autoimmunity in a Young Boy with Complete IL-12 Receptor β1 Deficiency
Source: Springer Nature journal article supplement (doi:10.1007/s10875-019-00637-0), 2019-05-01
Supplement: MOESM2 [file 16731654]

| **Laboratory investigation** | **Results** | **Normal reference range** |
| --- | --- | --- |
| IgG (gm/L) | 25.24 | 4.9-16.1 |
| IgA (gm/L) | 2.5 | 0.4-2.0 |
| IgM (gm/L) | 1.57 | 0.5-2.0 |
| IL-12 receptor β1 expression on stimulated lymphocytes | 1.4% (MFI-105) | Control: 33.3% (MFI-303) |
| CD3+ T cells | 76.8% | 60-76% |
| CD19+ B cells | 12.7% | 13-27% |
| CD16+/56+ NK cells | 5.7% | 4-23% |
| HIV serology | Non-reactive |  |
| Nitroblue tetrazolium (NBT) dye reduction test | Normal |
| Dihydrorhadamine (DHR) dye test | Normal |

HIV: human immunodeficiency virus; MFI: mean fluorescent intensity; NK cells: natural killer cells
